# Supplementary figures and images for: Tissue Circular RNA_0004018 and 0003570 as Novel Prognostic Biomarkers for Hepatitis B-Related Hepatocellular Carcinoma
Source: MDPI journal article supplement (doi:10.3390/genes14101963), 2023-10-20

# GAPDH

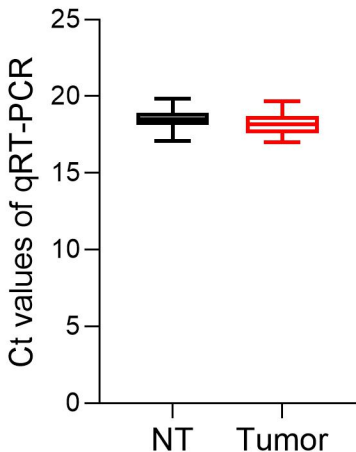

Supplement: s1 [file s1]
